# Supplementary material for: Different levels of blood pressure, different benefit from dual antiplatelet therapy in minor stroke or TIA patients
Source: PubMed Central journal article supplement (PMC5478626; doi:10.1038/s41598-017-04169-8), 2017-06-20
Supplement: 41598_2017_4169_MOESM1_ESM.pdf [file 41598_2017_4169_MOESM1_ESM.pdf]

**TITLE PAGE**

**TITLE:**

**Different levels of blood pressure, different benefit from dual antiplatelet therapy in minor stroke or TIA patients**

**SHORT TITLE:** blood pressure and benefits from dual antiplatelet treatment

**AUTHOR LIST**

Jie Xu\*, Yongli Tao\*, Hao Li, Hongqiu Gu , Xuewei Xie , Xia Meng, Yuming Xu ,  
Yilong Wang, Yongjun Wang

\* These authors contributed equally to the manuscript

Table 1s. Baseline characteristics of patients with different DBP levels

| Variables                                 | DBP $\geq$ 90                      |                    |            | DBP<90                            |                   |            |
|-------------------------------------------|------------------------------------|--------------------|------------|-----------------------------------|-------------------|------------|
|                                           | Clopidogrel<br>-aspirin<br>n= 1343 | Aspirin<br>n= 1368 | P<br>Value | Clopidogr<br>el-aspirin<br>n=1238 | Aspirin<br>n=1216 | P<br>Value |
| Age (median)                              | 60.14                              | 59.94              | 0.617      | 64.98                             | 64.56             | 0.070      |
| Female sex-no.(%)                         | 420 (31.3)                         | 455 (33.3)         | 0.269      | 431 (34.8)                        | 442(36.3)         | 0.427      |
| BMI (median)                              | 24.65                              | 24.80              | 0.471      | 24.22                             | 24.34             | 0.353      |
| Medical history-no.(%)                    |                                    |                    |            |                                   |                   |            |
| TIA OR Ischemic stroke                    | 302 (22.5)                         | 273 (20.0)         | 0.107      | 293 (23.7)                        | 305 (25.1)        | 0.414      |
| Myocardial infarction                     | 16 (1.2)                           | 22 (1.6)           | 0.355      | 27 (2.2)                          | 31 (2.5)          | 0.548      |
| Hypertension                              | 978 (72.8)                         | 974 (71.2)         | 0.347      | 737 (59.5)                        | 708 (58.2)        | 0.510      |
| Diabetes mellitus                         | 241 (17.9)                         | 250 (18.3)         | 0.824      | 308 (24.9)                        | 293 (24.1)        | 0.652      |
| Hypercholesterolemia                      | 139 (10.3)                         | 130 (9.5)          | 0.461      | 151 (12.2)                        | 153 (12.6)        | 0.772      |
| Current or previous smoking<br>-no. (%)   | 612 (45.6)                         | 600 (43.9)         | 0.371      | 503 (40.6)                        | 504 (41.4)        | 0.681      |
| Current or previous drinking<br>- no. (%) | 467 (34.8)                         | 463 (33.8)         | 0.611      | 336 (27.1)                        | 334 (27.5)        | 0.856      |
| Qualifying event — no. (%)                |                                    |                    | 0.883      |                                   |                   | 0.490      |
| TIA                                       | 342 (25.5)                         | 345 (25.2)         |            | 374 (30.2)                        | 383 (31.5)        |            |
| Minor stroke                              | 1001 (74.5)                        | 1023 (74.8)        |            | 864 (69.8)                        | 833 (68.5)        |            |
| Secondary prevention                      |                                    |                    |            |                                   |                   |            |
| anti-hypertension                         | 548 (41.0)                         | 536 (39.4)         | 0.387      | 379 (30.9)                        | 350 (29.0)        | 0.296      |
| lowering-lipid                            | 580 (43.4)                         | 583 (42.8)         | 0.762      | 514 (42.0)                        | 492 (40.8)        | 0.549      |

There were five patients missing the DBP value.

Abbreviations: BMI=body mass index; DBP=diastolic blood pressure; SD=standard deviation, TIA=transient ischemic attack.
